# Supplementary material for: FOXQ1, a Novel Target of the Wnt Pathway and a New Marker for Activation of Wnt Signaling in Solid Tumors
Source: PubMed Central journal article supplement (PMC3608605; doi:10.1371/journal.pone.0060051), 2013-03-26

# NCI60 panel

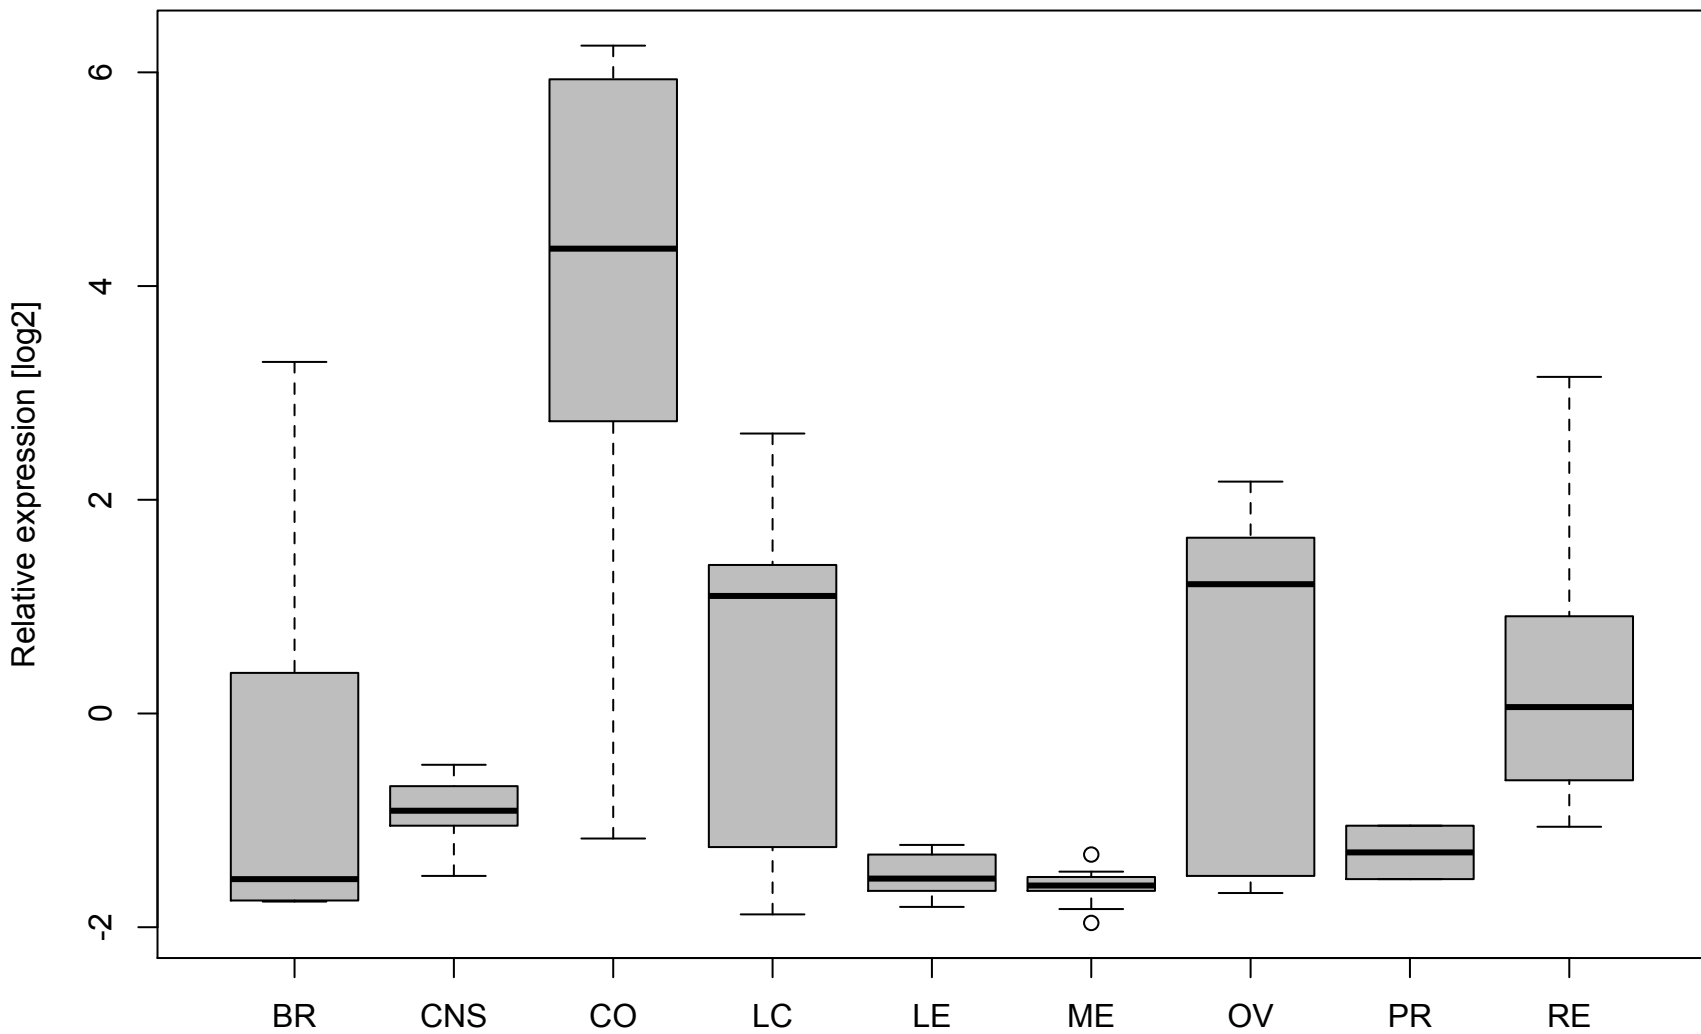

Supplement: pone.0060051.s003.pdf [file pone.0060051.s003.pdf]
