# Supplementary material for: FOXQ1, a Novel Target of the Wnt Pathway and a New Marker for Activation of Wnt Signaling in Solid Tumors
Source: PubMed Central journal article supplement (PMC3608605; doi:10.1371/journal.pone.0060051), 2013-03-26

**ALL, n=967**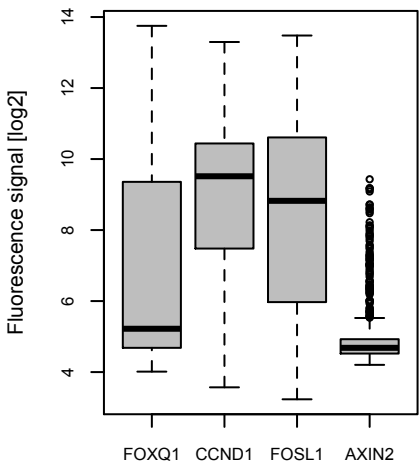**COLON, n=57**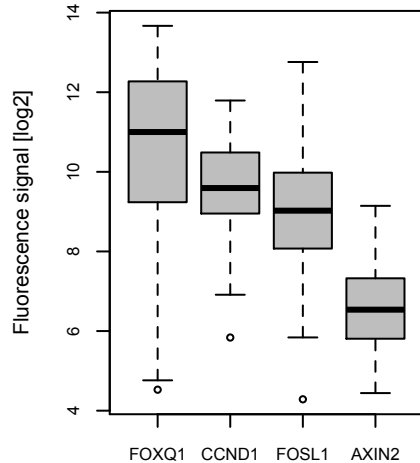**LUNG, n=174**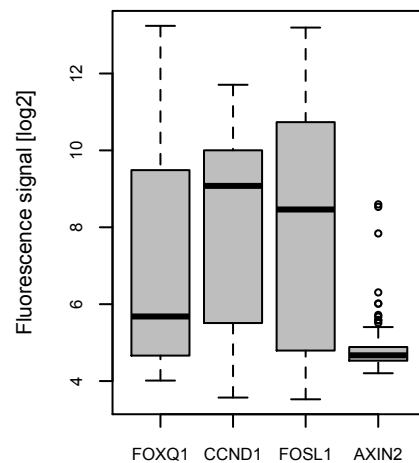**BREAST, n=58**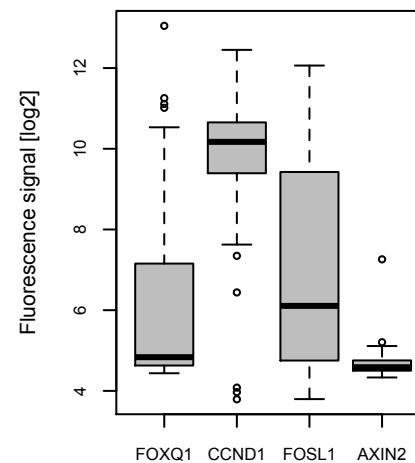**PROSTATE, n=7**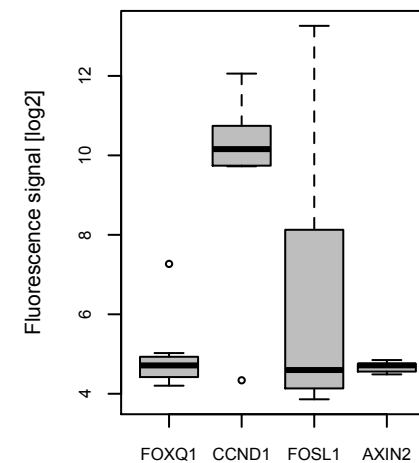**PANCREAS, n=44**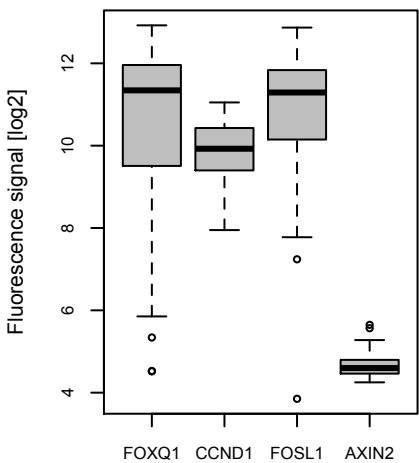**KIDNEY, n=22**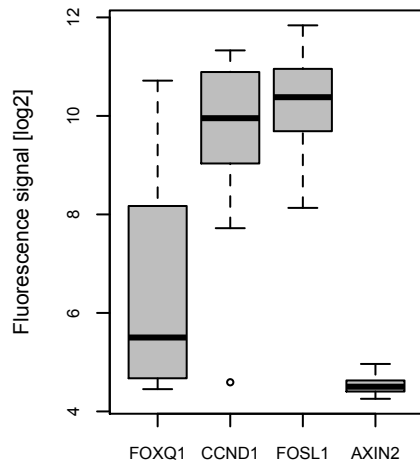**SKIN, n=60**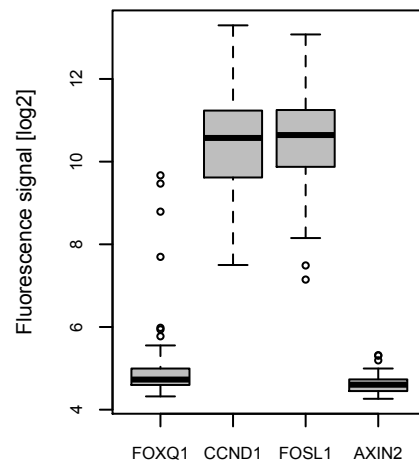**BONE, n=25**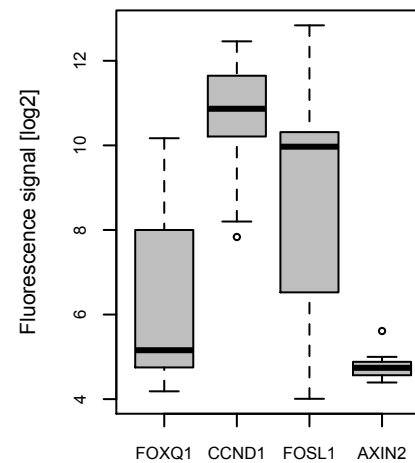**BLOOD, n=178**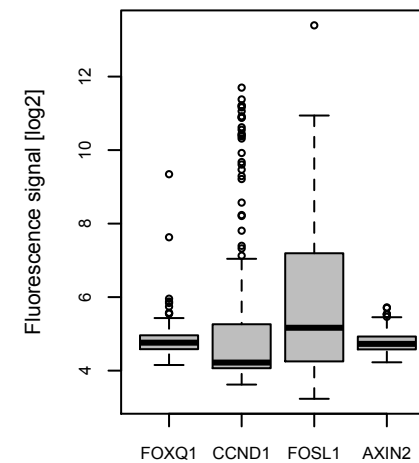

Supplement: pone.0060051.s004.pdf [file pone.0060051.s004.pdf]
